# Supplementary material
Source: Springer Nature journal article supplement (https://www.springermedizin.de/resource/supplementary/12882_2014_829_MOESM3_ESM.pdf/9454394)

*P*-Trend =0.02

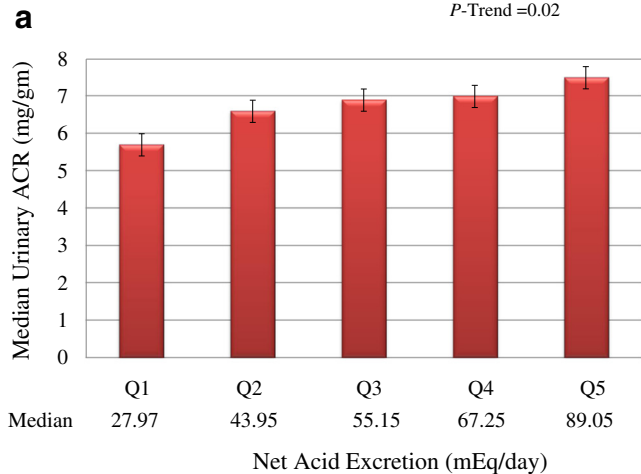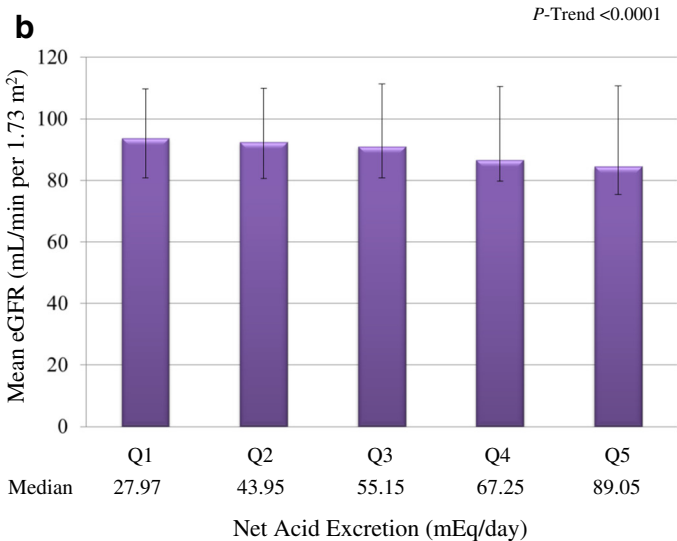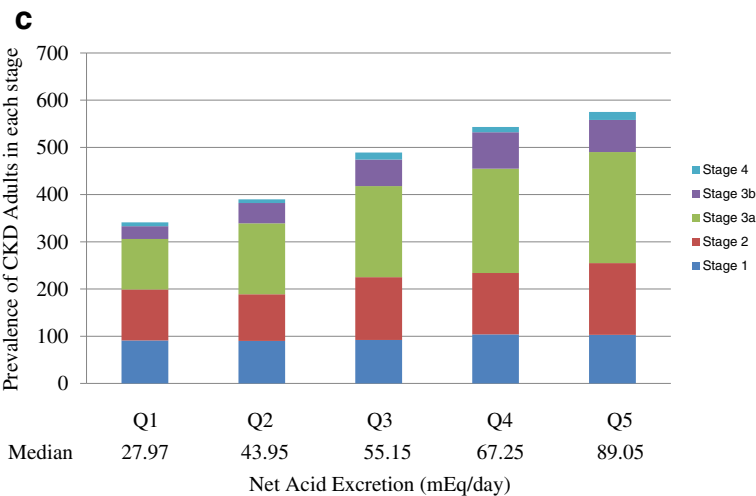

Supplement: MOESM3 [file 9454394]
